# Supplementary material
Source: MDPI journal article supplement (https://www.mdpi.com/1999-4907/12/12/1627)
Supplement: s1 [file s1]

**Table S1.** Ten *Pinus massoniana* SPX proteins sequences

>PmSPX1

MKFGRILKSQIEEAPPEWRDQYLSYKKLKKRLKFIFSLKVFQEAEDETPKVVRKRPRIEA  
LGVPEVAERESDSYSFAKRNDNSDCASIDDLNDIKDMSAAEFDFIELLNPELEKFNDFFV  
MAKEKEYIIRQKELQERIQRARNTVGPSPGKQDLIKVSHDVVKFHGEMVLLESYSILNFTG  
LVKITKKYDKRTGGILRLAFIQKVLGQPFFTMELLFKLVKQCEETLHNLFSSSEDEGEET  
EDEEEETEDEAVVDLGQDQIYRSTMAALRSMKEMRRGSSTYGPFSLPPLH

>PmNLA2

MKFGERFAEYLHGEDEHFLDKCSHLEYKRLKKVLKKCRDGYLHDGMGSDFEAGLYSSQ  
TTENEDVICGETAKGISNSCDSFSTCSSETCAVCDRIFFYELTKEVSAIVGCFSSRARLLH  
LHLASGFQRYLWRVKHFFADDHEAMIREGRHLVSYVAMNAIAIRKILKKYDKVHSSVNGR  
NFKTKLQAKHIELLKSPWLIELIAFQINTRDSEHGHISDIFPECSCDFTASDPVLTCTLP  
DSVKLEFSLTCPICLDIVFDPVALGCGHIFCKNCACTGASIPTIEGVKAANPRARCPICR  
QMGVYADSVHLPGLLVKKRCRGYWKERLHTERAERVKQAKEHWDLQSRFVLGY

>PmSPX-MFS1

MVAFGKKMKDWQYPEWKKYYIDYKLMKKKVRQYAQQIQEGKMDRRQVLKEMSTMLD  
KQIERTVFLFLEQQGYLAGRLEALGEEREMLEHNDLSSVHELQVAYTDIGQDLLKLLYF  
VEINATGLRKILKKFDKRVGYRFTNYVVTTRSNHPYSQLQQVFKHVGLGAVVGALSRLN  
AELRHHSGSYLSIYDQPSGVLPQDPVVDSIKAAVERLTHSTNFLRFLGQHALIIEEELPSHP  
GEDVEKQEFHLSLSLNLASTFLYMVNTYIIVPTANDYATSLGAAATVSGLIIGCMPIAQLV  
SSVYLSAWSNRSYFRPLLFSIFLVIGNLVYAIAYNLDLSLYILLGRLLCGLGSARAVNR  
RYITDCVPLKMRLRFSAYFVISSAMGMACGPALAGLLEFNTSVLGLTLNANTLPGWVMSA  
LWFFYVFWLWLSFKEPIHFKDNSHSSQVVNGLMERDIVDSDLTQPLALSSEAKEEMQDE  
ESIQNNSNRNKTHEMSHKPANSIFEACKLVTRPVKVTLLVYFMLKYATEM

>PmPHO1;H1

MVKFSKQFEAQLVPEWKDAFVDYRQLKKEIKKIQRQRQQAERADEAHGPGLNFNFERFS  
RMTKFIKKKACHCLGRDLEPKLIQVRKPEEDVYETEVIKQGFQDRDAAQVFFSTLDTQLN  
KVNQFYRTKEKEFLERGDALKEQLGILKGLKASLTTELKEKQSSHGGESENNSTHSVASTD  
DCRDDSI REPAEDGDLEDKQETAQLEEEGIIGFENNAGLVESPRRRSMDGIRSKKNSDKH  
LSKIKSNPRSRSSFSSHGRSMRMDIPLTTPTRTFSALTHVLWDDL MNQQNKDTPEGNRFML  
NKKNLHRAEKLIRGALVELYRGLGFLNTYRSLNMLAFEKILKKFDKVTGQQILPIYFKV  
VEKSYFNSTDKVVKLSDEIEELFVQYFAADRRKAMTYLKPQSKVSHTVTFFIGLFTGC  
FLALSVGYIIMAHLDKRYLLSNMTTSYQVFSLINLHIFLYGCNIVMWKRHRINYIFIFE  
ARKRELKYQDVFLICTTFMTIVAGCMVAQLALRGKGVSSVQVDTIPGLLLLASVVLLCP  
LNIIYRSTRFTFLRVLRNIVLSPFYKVVMVDFFMADQLTSQVPLLRQLEYVTCYYVSGSY  
KGNSNSHSCTDNKNYTDLLYVVSFLPYWVRAMQCARRWFDEGDIDHIANLGKYVSAMV  
AAGARLTHDRDLTHDRQHTAGWLAMVVITSTIATYQLYWDFVKDWGLLQRHSRNPWLR  
DELILKHKIIYFLAMALNLVLRRLAWLQTIMPSLFGINEAGFLLASLEVIRRGHWNFYRLENE  
HLNNAAGKYRAVTTVPLPFREVED

>PmSPX4

MKFGKRLQIQIDETLPEWRDKFLSYKPLKKRLKQVAGPEWFTAVGFCAASPQHDGSSSSV  
VDKFIQELRKGSAAALGEIVDKPANESAAEAASSKPASEIGAGINDEVSSSESSTHAPAERN  
SERKTGNFDEEDFINLINEELEKFNNFFLEKEEEYVIHLQELKERIERLKERSRQNGTYT  
SEYEFNEETVKIRRDIVAIHGEMVLLENYSSLNFIGLVKILKKYDKRTGALLRLPFTQSV  
LQQPFFTTELLSKLVRECEANLQSI FPSIPVDERGDCATEQSRDENNDANAQETLSLQGD  
TGIYRSTLAALRTIQDLRKGSSTYNPLSFAPFVPGDIEDGLVAGGNDKSKSNSSSHSTNG  
NAQNEE

>PmSPX-MFS2

MVEFGKKLKQRQYPEWQRYYINYKLMKKKKVRQYAQQAQEGTQDRRHLLKEFSKMLDH  
QVEKTVLFFLEQQGHLA GRRLALGEKCEALTQLNDVAEVHALREAYRALGQDLLKLLNF  
VEMNAIGVRKILKKFDKRF GYSFTDYYVTTRSHPYSQLQQVFKHV GIAAVVGALSRLNT  
VFQNRGGSYLSIYDQPIQALTLQDPVIDEIKDAVERLTNSTNFLRFLGQHALIIEEELPRPSEE  
YIQDQRYHFVSLVLNLVNTFLYMVNTYIIVPTADKYSMSLGAAATLCGVIIGSMAVAQLV  
SSVYFSAWSNKS YFRPLVFSSIVLFLGNIMYAMAYDLDSL SILLIGRILCGLGSARAVNR  
RYISDCVPLKTRLKASAAFVSASALGMAAGPAFAGILQINKSFFGITLNENTLPGWVMAA  
AWFVYLLWLWISFKEPSHEDEEDHTGEASSGGQAEEDAVKDGLTQPLLLSSRTSEKFIDE  
EAELEIDDSVESSEDSRKPASSIVEAYKLVTPPVKVQLLIYFMLKYAMEILLSSESVVTA  
YYFNWTTSSVAIFLALLGLTLLPVNVVVGNYSISNMFEDRQILFAAEVFTCVGILLSFNII  
FPYSVAQYVSGAFITFVSAEVLEGVNL SLLSKVMSSRLARGTYNGGLLSTEAGTLARVLA  
DGTITLAGYLGQGLLLNVTLLPTLIIGVISLIATGYTYNFLY

>PmNLA1

VCDRTFFPSLLNEMSAVLCCFNTGARQLLKLHIATGFQKYFAWLTSKWADDHLGMFKKG  
EDLVNYASINALAVRKILKKYDKIHYSKQGREFKTRAQSMQMEILQSPWLNELIAFRINSM  
NLSNGVTPVSDLSEDYSLTFDGEKPSLSCTVLD SVKLDIDLTCSICLETFFDPVSLKCH  
IFCFSACASAAVTIVDGLECADPKSKCPLCRQERVFGDAVRLGELSVLLSKSCPEYWEQ  
RLQTEKVERLRQTKEHWEKQCRAFMGF

>PmPHO1

MVKFSKQLEAQLIPEWKGA FVNRYLLKKDIKKIKLLRKNESWNKAHDSAEGFGCSKLES  
VIDFLKEKTKAWLPKASSHGDAIQVRRSISPSTRGYVYETELIQLFEQADAAKAFFASLDA  
ELNKVNEFYKRKEAEFLERGETLKRQTQILIDLKDILNDQGSSKKSSSGHGGSESGSDSS  
RYGGRSIPSEDGSGVAGEKEGEKEDEDVVASVFEKNGVTFVDSPSRLSGNRSKTKKGNTKL  
YLKGKSGSAGSARIGNTL SRQMRVDIPATTPSRTVSAITQMLWEDLVQNQPAKKDEAAFQ  
GGSGSTRINKKKLQHA EKMIRGAFVELYKGLGLLKTYSNLNMVAFGKILKKFDKVSEQQA  
APVYLKAVEKSYFNHSDKAVKLADDIESTFIKYFMEDDRKKAMKFLRPREKKDSHAVTLF  
IGIFTGFFLALFVG YAILAHLTGLYRDS DQSGYVATFFPIFSTLVLFNLHLFLYGCNIYM  
WRSTRINYSFIFEFS PATELTYRDVFLICSTFMTVVMGGMVAHLTLRLKGFSSDVIDSIP  
ALLLVSAAVLFCPINIIYRSSRFCFLRIMRNILLAPLYKVEMTDFFMADQLTSQIPLLR  
NVEYVACYYL TGSFAKHEYGACDHKTSYRQMAYVISFLPYYSRAMQCARRWFEEGDLSH  
LANLGKYVSAMIAAGARLSYTNQPHNDFLLALVVITSTIATYQLYWDFVRDWGLLNPRS  
KNPWLRDELI IKQKTVYFLSMALNFVLRRLAWVQSV MHLKMTGPGYRETPADKVIGFVLA

SLEVIRRGHWNFYRLENEHLNNVGKFRAVKTVPPLPFREVDSD

>PmSPX2

MKFGKRLKSQIEDTLPKWRDKFLAYKYLKKLVNSMSTGREASPPFGSDEIRGGSDLPNK  
RQKVSAGPVEAGAASDDYLPAFVLDFECNKRKMTAEESDFVDLLNAEIDKFNAFFMEQE  
EEYIIRQKELQDRIERLKSNRQNGAVFSETEYNEEMIKLRKDIVNFHGEMVLLNYSALN  
YTGIKILKKYDKRTGGLLRHPFIQKVLQQPFFTTEQLSKLIRECENTLQSLFPDYPQSV  
LQVPASPSSNGNHAETSSSTGKSDSQRLRVPLAATTKEEFGEENALFKGRGDEDGDCDAE  
GMESIYRSTMAALRTMKEIRRGSSSTYSVFSLPPLDETKSMPLCSLIPIC

>PmNLA3

MKFGERFSEYLHGADEHFLQKCSHVGYKRLKKVLKNCRVQYYDGTSPDPGVGLRNLPT  
ENVISPETASHIPKSCNSSSKTCSSETCTVCDQIFFYELTKEVSAIMGCFSARVRLLHLH  
LASRFQRYLWRVKHFFADDHEALIREGRHLVAYVAMNATAIRKILKKYDKVHSSVNGRNF  
KTKLQAKRIELLKSPWLIELIAFQINTRDPEHGHIGEIFPECSCDFTGSDPVITCTLLDS  
VKLEFNLTCPICLDTVFDPVVALGCGHVFCNICACTGASILTIEGVKSANQRARCPTCRQM  
GVYADSVHLTELGLLVKKRCRSYWNERLHTERAQRVKQAKEHWDLQSRFILGF
